# Supplementary material for: Fibre intake for optimal health: how can healthcare professionals support people to reach dietary recommendations?
Source: PubMed Central journal article supplement — BMJ. 2022 Jul 20;378:e054370. doi: 10.1136/bmj-2020-054370 (PMC9298262; doi:10.1136/bmj-2020-054370), 2022-07-20
Supplement: mckn054370.ww1.pdf [file mckn054370.ww1.pdf]

## Whole Grains

Oatmeal,  
cooked  
1 cup  
**4.2 g fiber**

Quinoa,  
cooked  
½ cup  
**2.2 g fiber**

Popcorn, plain  
3 cups  
**3.5 g fiber**

Barley, cooked  
½ cup  
**4.3 g fiber**

Whole wheat  
spaghetti,  
cooked, ½ cup  
**2.7 g fiber**

## Fruits

Avocado  
½ fruit  
**4.6 g fiber**

Apple  
(with skin)  
1 medium  
**4.4 g fiber**

Pear  
(w skin)  
1 medium  
**5.6 g fiber**

Raspberries  
1 cup  
**8.0 g fiber**

Banana  
1 medium  
**3.1 g fiber**

## Vegetables

Spinach, raw  
2 cups  
**1.3 g fiber**

Cubed Sweet  
Potatoes  
(raw) 1 cup  
**4.0 g fiber**

Broccoli,  
cooked  
1 cup  
**5.2 g fiber**

Green peas  
1/2 cup  
**3.6 g fiber**

Butternut  
squash, raw  
1 cup cubed  
**3.9 g fiber**

## Beans/Legumes

Chickpeas  
½ cup  
**5.2 g fiber**

Lima beans  
½ cup  
**4.5 g fiber**

Black beans  
½ cup  
**9 g fiber**

Soybean  
½ cup  
**5.1 g fiber**

Kidney bean  
½ cup  
**4.9g fiber**

## Nuts & Seeds

Flaxseed  
1 tbsp.  
**2.9 g fiber**

Chia seeds  
1 tbsp.  
**3.4 g fiber**

Almonds,  
whole  
¼ cup  
(23 nuts)  
**3.8 g fiber**

Walnuts  
¼ cup  
**2.0 g fiber**

Peanut butter  
(chunky)  
1 tbsp.  
**1.0 g fiber**

## Whole Grains

Oatmeal,  
cooked  
234g  
**4.2 g fiber**

Quinoa,  
cooked  
194g  
**2.2 g fiber**

Popcorn, plain  
93g  
**3.5 g fiber**

Barley, cooked  
24g  
**4.3 g fiber**

Whole wheat  
spaghetti,  
cooked, 78g  
**2.7 g fiber**

## Fruits

Avocado  
½ fruit (68g)  
**4.6 g fiber**

Apple  
(with skin)  
1 medium  
(182g)  
**4.4 g fiber**

Pear  
(w skin)  
1 medium  
(178g)  
**5.6 g fiber**

Raspberries  
1 cup  
(123g)  
**8.0 g fiber**

Banana  
1 medium  
(118g)  
**3.1 g fiber**

## Vegetables

Spinach, raw  
60g  
**1.3 g fiber**

Cubed Sweet  
Potatoes  
(raw) 133g  
**4.0 g fiber**

Broccoli,  
cooked  
156g  
**5.2 g fiber**

Green peas  
123g  
**3.6 g fiber**

Butternut  
squash, raw,  
cubed  
118g  
**3.9 g fiber**

## Beans/Legumes

Chickpeas  
85g  
**5.2 g fiber**

Lima beans  
85g  
**4.5 g fiber**

Black beans  
85g  
**9 g fiber**

Soybean  
85g  
**5.1 g fiber**

Kidney bean  
85g  
**4.9g fiber**

## Nuts & Seeds

Flaxseed  
10g  
**2.9 g fiber**

Chia seeds  
10g  
**3.4 g fiber**

Almonds,  
whole  
35g  
(23 nuts)  
**3.8 g fiber**

Walnuts  
¼ cup  
30g  
**2.0 g fiber**

Peanut butter  
(chunky)  
16g  
**1.0 g fiber**
